# Supplementary material for: Antibody responses induced by trivalent inactivated influenza vaccine among pregnant and non-pregnant women in Thailand: A matched cohort study
Source: PubMed Central journal article supplement (PMC8189519; doi:10.1371/journal.pone.0253028), 2021-06-09
Supplement: pone.0253028.s001.pdf [file pone.0253028.s001.pdf]

Supplemental Table 1. Vaccine strain matching during the study period\*

| <b>Influenza strains</b> | <b>2018 TIV composition</b>             | <b>Circulating strains</b>                                            | <b>Match during the study period</b> |
|--------------------------|-----------------------------------------|-----------------------------------------------------------------------|--------------------------------------|
| <b>A(H1N1)</b>           | A/Michigan/45/2015 (H1N1)pdm09          | A/Michigan/45/2015 (H1N1)pdm09                                        | 100%                                 |
| <b>A(H3N2)</b>           | A/Singapore/ INFIMH-16-0019/2016 (H3N2) | A/Singapore/ INFIMH-16-0019/2016 (H3N2)                               | 78.2%                                |
| <b>B</b>                 | B/Phuket /3073/2013 (Yamataga lineage)  | A/HongKong/4801/2014 (H3N2)<br>B/Phuket /3073/2013 (Yamataga lineage) | 100%                                 |

\*Circulating strains and vaccine strain match data obtained from the sentinel surveillance of Thai National Institute of Health (August 2018 data)
